# Supplementary material
Source: HighWire-hosted journal article supplement (https://cmaj.ca/content/suppl/2011/06/27/cmaj.101498)
Supplement: effect-boorsma-2-at.pdf [file effect-boorsma-2-at.pdf]

**Appendix 2 (as supplied by the authors): Explanation of risk-adjusted indicators of quality of care**

| CODE  | INDICATOR                                     | COUNTER                                                                                                                                                       | DENOMINATOR                                                                                                                                                        |
|-------|-----------------------------------------------|---------------------------------------------------------------------------------------------------------------------------------------------------------------|--------------------------------------------------------------------------------------------------------------------------------------------------------------------|
| adl01 | Activities of daily life, late-loss worsening | Scores of measurement are compared with the previous measurement on bed mobility, eating, toilet transfer, toilet use, two scoring units higher.              | Is not comatose, not terminal, no hospice care. On the previous assessment bed mobility, eating, toilet transfer, toilet use, do not already have a maximum score. |
| mob01 | Locomotion worsening                          | Moving on the ward score > than the previous measurement.                                                                                                     | Is not comatose, not terminal, no hospice care. In the previous assessment is not totally dependent on moving across the ward.                                     |
| fal01 | Falls increase change                         | Cases with falls in the last 30 days.                                                                                                                         | In the previous assessment cases without falls in the last 30 days.                                                                                                |
| cog01 | Cognitive decline                             | Cognition Performance Scale > than the previous measurement.                                                                                                  | Is not comatose, not terminal, not hospice care. In the previous assessment Cognition Performance Scale <6.                                                        |
| com01 | Communication decline                         | Communication score > than the previous measurement                                                                                                           | Is not comatose, not terminal, no hospice care. In the previous assessment Communication score <6.                                                                 |
| del01 | Delirium new or persistent                    | Recently started delirium problem (score 1 or 2 on the items) or new delirium and in the previous assessment score 1 or 2 and Cognition Performance Scale <4. | Is not comatose, not terminal, no hospice care.                                                                                                                    |
| beh01 | Behaviour problem                             | Presence of 4 behavioral problems.                                                                                                                            | Without coma, staying 30 days or longer. Only most recent assessment.                                                                                              |
| beh02 | Idem, high risk                               | Idem                                                                                                                                                          | Idem & impaired cognitive skills for daily decision making.                                                                                                        |
| beh03 | Idem, low risk                                | Idem                                                                                                                                                          | Idem & all cases not under high risk denominator.                                                                                                                  |
| soc02 | Little or no (social) activities              | Little time or no time involved in activities.                                                                                                                | Is not comatose, no terminal, no hospice care, stay 30 days or longer. Only most recent measurement.                                                               |
| cat01 | New indwelling catheter                       | Score on catheter stay > than previous measurement.                                                                                                           | Is not terminal, no hospice care.                                                                                                                                  |
| cat02 | Indwelling catheter                           | Stay present Catheter.                                                                                                                                        | Is not terminal, no hospice care and stay 30 days or longer. Only most recent measurement.                                                                         |
| cnt01 | Bladder/bowel incontinence                    | Often or always incontinent of faeces or urine.                                                                                                               | Not comatose, not terminal, no hospice care, stay 30 days or longer, no residence and no stoma catheter. Only most recent measurement.                             |
| Cnt05 | Idem, high risk                               | Idem                                                                                                                                                          | Idem & impaired cognitive skills & short term memory or extensive assistance in walking or locomotion or toilet transfer.                                          |
| Cnt06 | Idem, low risk                                | Idem                                                                                                                                                          | Idem & all cases not under high risk denominator.                                                                                                                  |
| cnt02 | Bowel continence decline                      | Faecal incontinence score > than previous measurement.                                                                                                        | Is not comatose, not terminal, no hospice care. In the previous assessment has not completely incontinent for faeces.                                              |

*continued*

|       |                                       |                                                                                 |                                                                                                                                                  |
|-------|---------------------------------------|---------------------------------------------------------------------------------|--------------------------------------------------------------------------------------------------------------------------------------------------|
| cnt03 | Bladder continence decline            | Urinary incontinence score > than previous measurement.                         | Is not comatose, not terminal, no hospice care. In the previous assessment has not completely incontinent for urine.                             |
| cnt04 | Urinary tract infection               | Urinary tract infection.                                                        | Not terminally ill, no hospice care, stay 30 days or longer. Only most recent measurement.                                                       |
| nut01 | Feeding tube                          | Presence of a feeding tube.                                                     | Not comatose, not terminal, not hospice care, stay 30 days or longer. Only most recent measurement.                                              |
| bmi01 | Low Body Mass Index                   | Body Mass Index $\leq$ 19.                                                      | Not terminally ill, not hospice care, stay 30 days or longer and a Body Mass Index between 12 and 40. Only most recent measurement.              |
| wgt01 | Weight loss change                    | 5% or more weight loss in the last 30 days or 10% or more in the last 180 days. | Not terminally ill, no hospice care, does not participate in a weight-change treatment, staying 30 days or longer. Only most recent measurement. |
| pai01 | Inadequate pain management prevalence | Daily moderate or worse pain, or from time to time terrible or unbearable pain. | Staying 30 days or longer. Only most recent measurement.                                                                                         |
| pan01 | Pain worsening                        | Score on pain frequency > than previous measurement.                            | In the previous assessment is no daily pain.                                                                                                     |
| pru01 | Pressure ulcer stage 1-4              | Presence of pressure ulcer.                                                     | Staying 30 days or longer. Only most recent measurement.                                                                                         |
| pru02 | Idem, high risk                       | Idem                                                                            | Idem & Extensive assistance in locomotion or toilet transfer or coma.                                                                            |
| pru03 | Idem, low risk                        | Idem                                                                            | Idem & all cases not under high risk denominator.                                                                                                |
| pru04 | Pressure ulcers worsening             | Decubitus score > than previous measurement.                                    | In the previous assessment is not the worst possible pressure ulcer.                                                                             |
| bur01 | Burns, skin tears or cuts             | Skin burns or cuts are present.                                                 | Staying 30 days or longer. Only most recent measurement.                                                                                         |
| res01 | Physical restraints use               | Daily use torso restraint, limb restraint or seat which can not be resurrected. | Staying 30 days or longer. Only most recent measurement.                                                                                         |
| drg01 | Antipsychotics use                    | Used antipsychotics.                                                            | Not terminally ill, no hospice care, no psychotic disorder. Staying 30 days or longer. Only most recent measurement.                             |
| drg02 | Idem, high risk                       | Idem                                                                            | Idem & impaired cognitive skills & short term memory & (verbal or physical abuse or inappropriate behaviour).                                    |
| drg03 | Idem, low risk                        | Idem                                                                            | Idem & all cases not under high risk denominator.                                                                                                |
